# Supplementary material for: In situformation of nickel sulfide quantum dots embedded into a two-dimensional metal–organic framework for water splitting
Source: Royal Society of Chemistry journal article supplement (doi:10.1039/d2qi02279f), 2023-01-01
Supplement: d2qi02279f1.pdf [file d2qi02279f1.pdf]

## Supporting Information

### In-situ formation of Nickel sulfide quantum dots embedded into two-dimensional metal-organic framework for water splitting

Jin Lin<sup>a,b</sup>, Huajun Zhou<sup>a,b</sup>, R. S. Amin<sup>c</sup>, Amani E. Fetohi<sup>c</sup>, K.M. El-Khatib<sup>c</sup>, Chao

Wang<sup>a,b\*</sup>, Li Guo<sup>b\*</sup>, Yanzhong Wang<sup>a,b\*</sup>

<sup>a</sup>*School of Materials Science and Engineering, North University of China, Taiyuan 030051, P. R.*

*China*

<sup>b</sup>*Institute of Advanced Energy Materials and System, North University of China, Taiyuan 030051,*

*P. R. China*

<sup>c</sup>*Chemical Engineering Department, Engineering Research and Renewable Energy Institute,*

*National Research Centre, 33 El-Buhouth St., Dokki, Cairo, 12622, Egypt.*

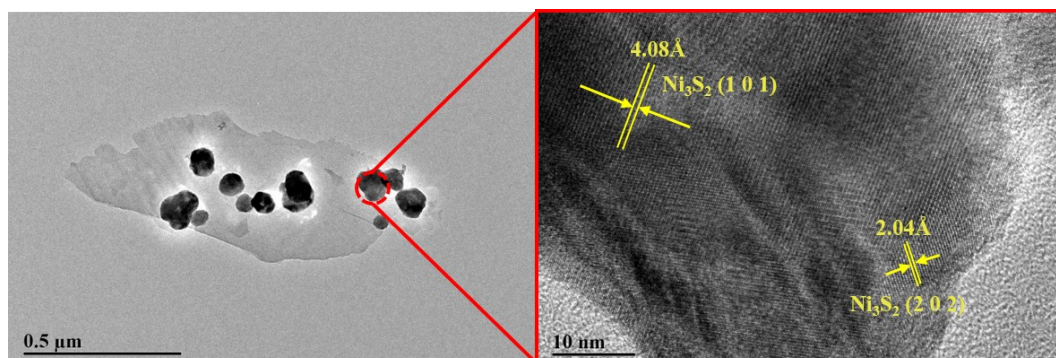

**Figure S1** (a) TEM and (b) HRTEM images of Ni<sub>3</sub>S<sub>2</sub>@NiFe-TPA

\* Corresponding author: Tel. / Fax: +86-0351-3557519. E-mail: wangchao\_nuc@126.com (C. Wang), gl814@qq.com (L. Guo) and wzyzletter@nuc.edu.cn (Y. Z. Wang).

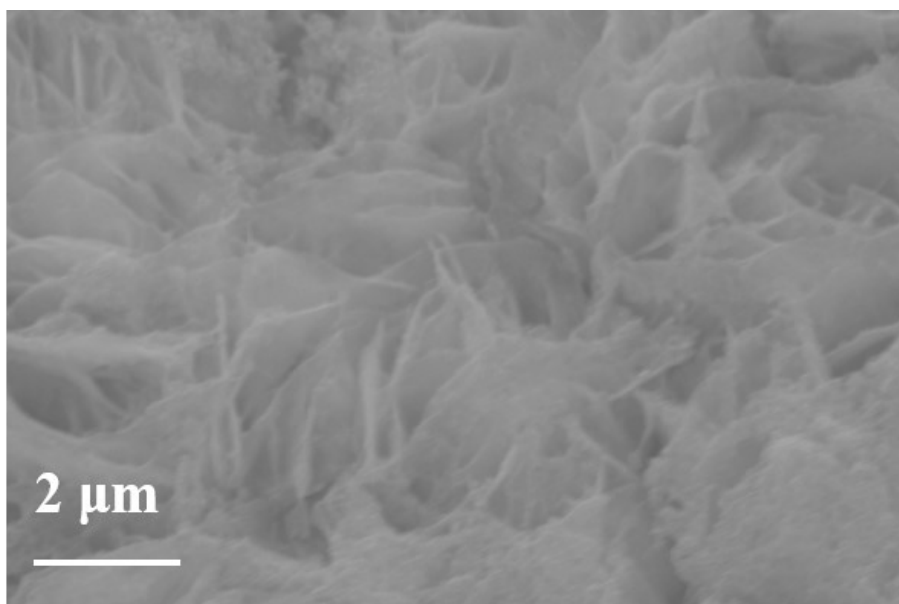

**Figure S2** the SEM curve of NSQDs@NiFe-TPA after the stability test of OER

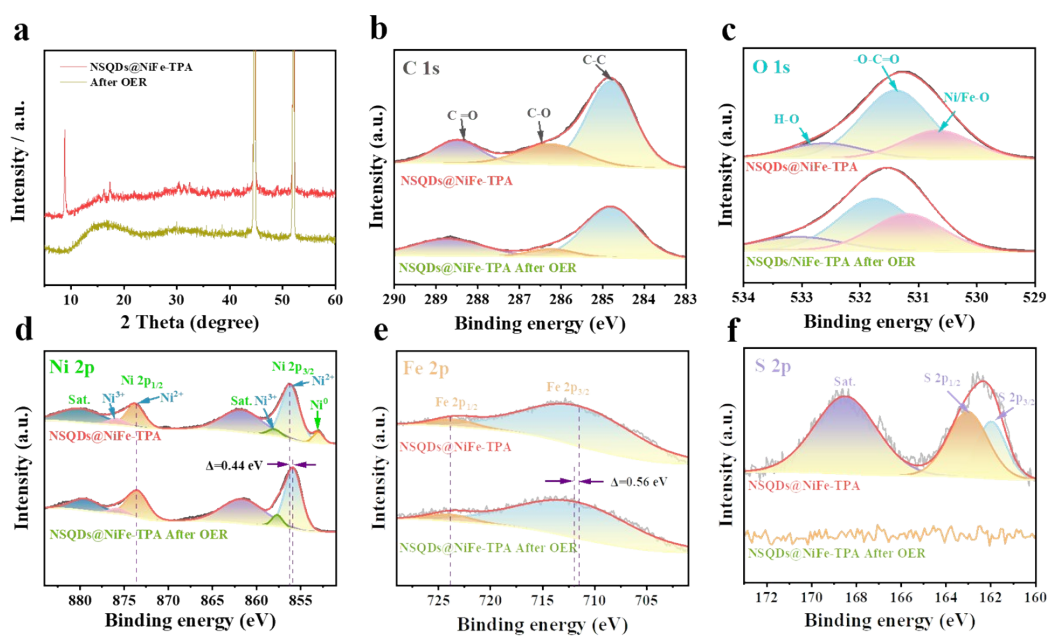

**Figure S3** (a) the XRD curve and the high resolution XPS of (b) C 1s, (c) O 1s, (d) Ni 2p (e) Fe 2p and (f) S 2p of NSQDs@NiFe-TPA and NSQDs@NiFe-TPA after OER.

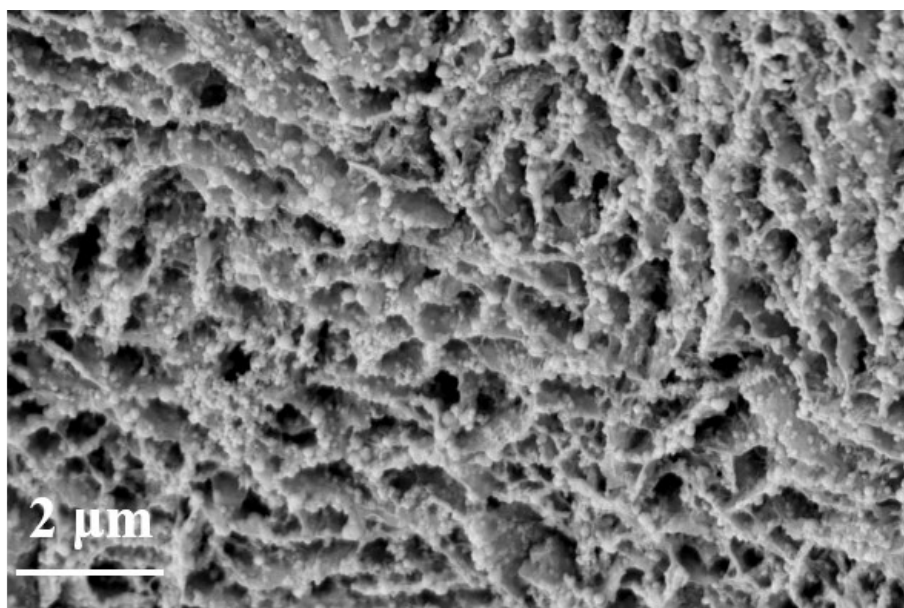

Figure S4 the SEM curve of Ni<sub>3</sub>S<sub>2</sub>@NiFe-TPA after HER.

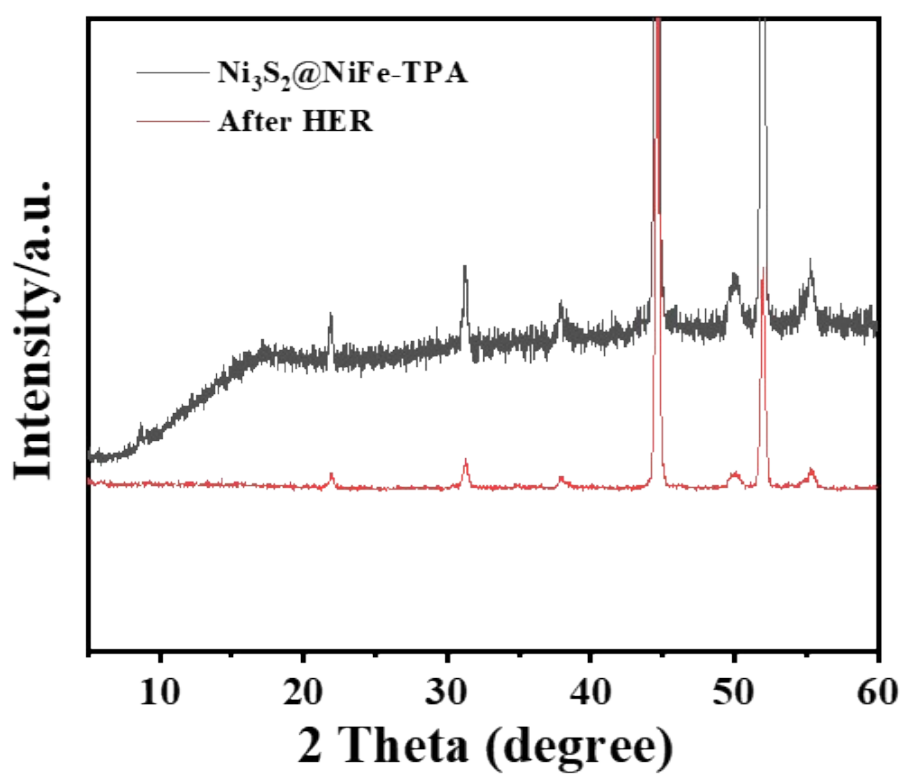

Figure S5 XRD patterns of Ni<sub>3</sub>S<sub>2</sub>@NiFe-TPA and Ni<sub>3</sub>S<sub>2</sub>@NiFe-TPA after HER.

**Table S1** A performance comparison with recently published non-noble metal-based

## OER catalysts

| Electrocatalyst                                                            | Electrolyt<br>e | Overpotential (mV vs. RHE) |  | Ref.      |
|----------------------------------------------------------------------------|-----------------|----------------------------|--|-----------|
|                                                                            |                 | 10 mA cm <sup>-2</sup>     |  |           |
| NSQDs@NiFe-TPA                                                             | 1 M KOH         | 219                        |  | This work |
| Co(Zn)S <sub>2</sub> /CC                                                   | 1 M KOH         | 248                        |  | [1]       |
| Fe-NiCo-S                                                                  | 1 M KOH         | 247                        |  | [2]       |
| CoFe-MS/MOF                                                                | 1 M KOH         | 264                        |  | [3]       |
| N, P-Co <sub>9</sub> S <sub>8</sub> /CoS <sub>2</sub> /Co <sub>1-x</sub> S | 1 M KOH         | 285                        |  | [4]       |
| Ti-CoS <sub>x</sub> HSS                                                    | 1 M KOH         | 249                        |  | [5]       |
| Ni-Co-S/NSC                                                                | 1 M KOH         | 309                        |  | [6]       |

**Table S1** A performance comparison with recently published non-noble metal-based

## HER catalysts

| Electrocatalyst                           | Electrolyt<br>e | Overpotential (mV vs. RHE) |  | Ref.      |
|-------------------------------------------|-----------------|----------------------------|--|-----------|
|                                           |                 | 10 mA cm <sup>-2</sup>     |  |           |
| Ni <sub>3</sub> S <sub>2</sub> @NiFe-TPA  | 1 M KOH         | 109                        |  | This work |
| Ni <sub>3</sub> S <sub>2</sub> @2D Co-MOF | 1 M KOH         | 140                        |  | [7]       |
| 40% MoS <sub>x</sub> /Co-MOF-74           | 1 M KOH         | 147                        |  | [8]       |
| Ni-M@C-130                                | 1 M KOH         | 123                        |  | [9]       |
| CoS <sub>1.097</sub> -160                 | 1 M KOH         | 163                        |  | [10]      |
| MoS <sub>x</sub> /Ni-MOF-74               | 1 M KOH         | 114                        |  | [11]      |
| Ni-Co-S/NSC                               | 1 M KOH         | 177                        |  | [12]      |

**References**

[1] J. Wu, Y. Zhang, B. Zhang, S. Li and P. Xu, Zn-Doped CoS<sub>2</sub> Nanoarrays for an

Efficient Oxygen Evolution Reaction: Understanding the Doping Effect for a Precatalyst, *ACS Applied Materials & Interfaces*, 2022, 14, 14235-14242.

[2] R. Liu, S. Xu, X. Shao, Y. Wen, X. Shi, L. Huang, M. Hong, J. Hu and Z. Yang, Defect-Engineered NiCo-S Composite as a Bifunctional Electrode for High-Performance Supercapacitor and Electrocatalysis, *ACS Applied Materials & Interfaces*, 2021, 13, 47717-47727.

[3] R. Yu, C. Wang, D. Liu, Z. Wu, J. Li and Y. Du, Bimetallic sulfide particles incorporated in Fe/Co-based metal–organic framework ultrathin nanosheets toward boosted electrocatalysis of the oxygen evolution reaction, *Inorganic Chemistry Frontiers*, 2022, 9, 3130-3137.

[4] Z. Zhang, S. Tang, X. Lin, C. Liu, S. Hu and Q. Huang, N, P-doped multiphase transition metal sulfides are used for efficient electrocatalytic oxygen evolution reaction, *Applied Surface Science*, 2022, 584, 152546.

[5] T. Bao, Y. Xia, J. Lu, C. Zhang, J. Wang, L. Yuan, Y. Zhang, C. Liu and C. Yu, A Pacman-Like Titanium-Doped Cobalt Sulfide Hollow Superstructure for Electrocatalytic Oxygen Evolution, *Small*, 2022, 18, 2103106.

[6] Z. Wu, H. Wu, T. Niu, S. Wang, G. Fu, W. Jin and T. Ma, Sulfurated Metal–Organic Framework-Derived Nanocomposites for Efficient Bifunctional Oxygen Electrocatalysis and Rechargeable Zn–Air Battery, *ACS Sustainable Chemistry & Engineering*, 2020, 8, 9226-9234.

[7] J. Cheng, X. Yang, X. Yang, R. Xia, Y. Xu, W. Sun and J. Zhou, Hierarchical Ni<sub>3</sub>S<sub>2</sub>@2D Co MOF nanosheets as efficient hetero-electrocatalyst for hydrogen

evolution reaction in alkaline solution, *Fuel Processing Technology*, 2022, 229, 107174.

[8] H. H. Do, Q. V. Le, M. A. Tekalgne, A. V. Tran, T. H. Lee, S. H. Hong, S. M. Han, S. H. Ahn, Y. J. Kim, H. W. Jang and S. Y. Kim, Metal–organic framework-derived  $\text{MoS}_x$  composites as efficient electrocatalysts for hydrogen evolution reaction, *Journal of Alloys and Compounds*, 2021, 852, 156952.

[9] K. Srinivas, Y. Chen, X. Wang, B. Wang, M. Karpuraranjith, W. Wang, Z. Su, W. Zhang and D. Yang, Constructing Ni/NiS Heteronanoparticle-Embedded Metal–Organic Framework-Derived Nanosheets for Enhanced Water-Splitting Catalysis, *ACS Sustainable Chemistry & Engineering*, 2021, 9, 1920-1931.

[10] N. Sahu, J. K. Das and J. N. Behera, Metal–organic framework (MOF)-derived plate-shaped  $\text{CoS}_{1.097}$  nanoparticles for an improved hydrogen evolution reaction, *Dalton Transactions*, 2022, 51, 10272-10278.

[11] H. H. Do, Q. V. Le, T. V. Nguyen, K. A. Huynh, M. A. Tekalgne, V. A. Tran, T. H. Lee, J. H. Cho, M. Shokouhimehr, S. H. Ahn, H. W. Jang and S. Y. Kim, Synthesis of  $\text{MoS}_x/\text{Ni}$ -metal-organic framework-74 composites as efficient electrocatalysts for hydrogen evolution reactions, *International Journal of Energy Research*, 2021, 45, 9638-9647.

[12] Y. Zheng, H. Hu, Y. Zhu, J. Rong, T. Zhang, D. Yang, Q. Wen and F. Qiu, ZIF-67-Derived  $(\text{NiCo})\text{S}_2@\text{NC}$  Nanosheet Arrays Hybrid for Efficient Overall Water Splitting, *Inorganic Chemistry*, 2022, 61, 14436-14446.
